# Supplementary material
Source: publisher figshare collection journal article supplement (https://gsajournals.figshare.com/ndownloader/files/14442803)
Supplement: Supplementary file 1 [file 14442803]

## Sheet: Summary_QTL.xls
Table S4. Effect of subsampling the BRIDG6 population by family and by individuals
			FAMILYb				INDIVIDUALSb
			Random Families				Random individuals, including all families				Random individuals regardless of families
		Number of Families	10	25	50	75	88	88	88	88	88	88	88	88
		Average No. Individuals per family	25	25	25	25	3	6	11	23	3	6	11	22
		Total sample size	250	625	1250	1875	264	528	968	2024	264	528	968	2024
QTLa	Maximum -log(p)	Number of SNPs
2.1	142.43	373	100	100	100	100	100	100	100	100	100	100	100	100
7.2	44.56	99	74	98	100	100	14	99	100	100	24	87	100	100
7.1	32.44	197	25	56	93	100	7	18	62	100	6	12	56	100
3.1	23.19	9	14	52	86	99	0	4	57	100	0	6	33	100
2.13	20.95	14	1	37	98	100	7	43	92	100	9	44	95	100
2.11	17.17	2	4	18	79	98	3	20	72	99	6	31	83	100
2.6	14.27	9	1	16	59	89	2	8	60	98	2	22	56	99
1.2	13.42	50	6	28	50	83	1	10	46	91	1	2	37	85
2.7	10.36	4	0	7	38	69	0	9	35	82	6	13	37	79
2.1	10.18	1	0	1	25	38	1	3	17	49	2	9	15	66
2.12	10.16	6	0	6	16	45	0	3	13	54	1	6	21	71
1.1	9.2	13	1	14	35	68	1	9	23	80	0	5	14	49
2.15	8.7	4	1	20	57	93	4	14	70	98	4	25	60	96
2.14	8.17	2	2	3	14	31	0	3	8	46	2	0	15	52
2.3	7.98	6	1	5	24	57	0	3	22	60	2	6	14	61
2.9	7.9	6	1	0	10	17	1	3	7	20	1	6	12	36
2.4	7.75	1	1	6	22	53	0	3	11	63	0	6	11	49
5.2	7.31	41	2	1	0	2	0	0	0	2	0	0	0	6
2.16	6.66	76	0	2	6	15	0	1	9	24	0	2	8	29
2.8	6.47	7	1	5	10	32	0	0	9	36	0	4	5	18
2.2	6.03	21	5	7	13	18	1	4	5	22	7	7	13	28
2.5	5.88	11	0	5	15	31	1	1	13	35	0	2	15	41
5.1	5.49	10	0	8	17	27	0	4	15	29	0	2	9	25
aQTL and –log(p) are from the whole population analysis using all RILs from the BRIDG6 population.
bSignificant marker-trait associations in random samples by family and across families. One hundred samples of 5, 10, 25, 50, and 75 families, and each 264, 528, 968, and 2012 individuals across families were randomly sampled from the BRIDG population. The frequency of detection in each sample is colored from red to green, where green indicates a QTL was detected more frequently.
Gray background defines the selection criteria for the subsampling
